# Supplementary material for: In situbiosynthesized gold nanoclusters inhibiting cancer developmentviathe PI3K–AKT signaling pathway
Source: Royal Society of Chemistry journal article supplement (doi:10.1039/c9tb01070j), 2019-01-01
Supplement: c9tb01070j2.pdf [file c9tb01070j2.pdf]

|           |           |
|-----------|-----------|
| SOAT2,    | PCDH1,    |
| SMCHD1,   | PCDHAC2,  |
| SYT13,    | PCDHGB1,  |
| SYNRG,    | SLURP1,   |
| TMCO2,    | SPINK1,   |
| TMEM140,  | SERPINA3, |
| TMEM188,  | TMEM27,   |
| TMEM191C, | RLBP1     |
| TMEM2,    | MPP4,     |
| ZDHHC19,  | ANXA9     |
| MRGPRX4,  |           |
| ARHGAP32, |           |
| DOK3,     |           |
| EDA,      |           |
| GJB3,     |           |
| KRT1,     |           |
| OR1D5,    |           |
| OR13A1,   |           |
| OR5P2,    |           |
| OR7A17,   |           |
| OPRL1,    |           |
| KCNU1,    |           |
| KCNK2,    |           |
| KCNG4,    |           |
| SOC37,    |           |
| GAS7,     |           |

---
