# Supplementary material for: In situbiosynthesized gold nanoclusters inhibiting cancer developmentviathe PI3K–AKT signaling pathway
Source: Royal Society of Chemistry journal article supplement (doi:10.1039/c9tb01070j), 2019-01-01
Supplement: c9tb01070j3.pdf [file c9tb01070j3.pdf]

### Supporting Information:

#### *In situ* biosynthesized gold nanoclusters inhibiting cancer development via PI3K-AKT signaling pathway

Maonan Wang<sup>†a</sup>, Zeqian Yu<sup>†b,c</sup>, Huan Feng<sup>a</sup>, Jianling Wang<sup>a</sup>, Lishan Wang<sup>b,c</sup>, Yu Zhang<sup>e</sup>, Lihong Yin<sup>d</sup>, Ying Du<sup>d</sup>, Hui Jiang<sup>a</sup>, Xuemei Wang<sup>\*a</sup> & Jiahua Zhou<sup>\*b,c</sup>

<sup>a</sup>State Key Laboratory of Bioelectronics (Chien-Shiung Wu Lab), School of Biological Science and Medical Engineering, Southeast University, Nanjing 210096, China.

<sup>b</sup>Department of Hepatic-Biliary-Pancreatic Center, Zhongda Hospital, Southeast University, Nanjing, China

<sup>c</sup>Department of Hepatobiliary Surgery Research Institute, Southeast University, Nanjing, China

<sup>d</sup>School of Public Health, Southeast University, Nanjing China

<sup>e</sup>School of Medicine, Southeast University, Nanjing, China

<sup>†</sup>Common first author

<sup>\*</sup>Common corresponding author

E-mail: xuewang@seu.edu.cn, zhoujh@seu.edu.cn

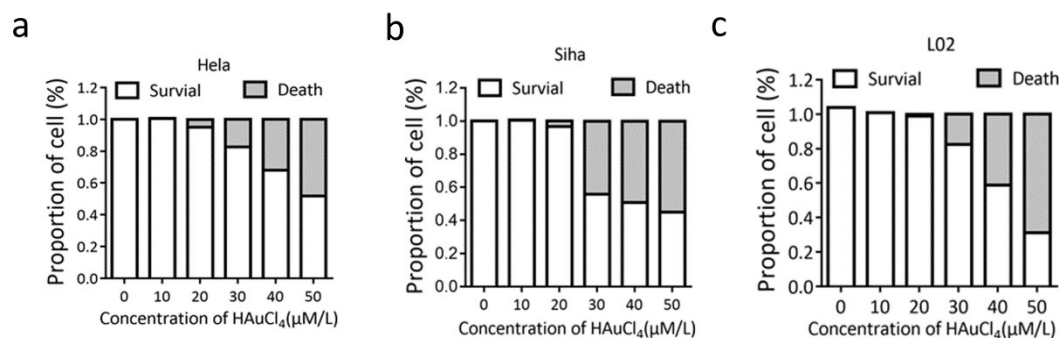

**Figure 1.** *In situ* biosynthesized Au NCs have no cytotoxicity. MTT toxicity assay was carried out with tumor cells (HeLa, A549) and normal cell (L02). 20 μM/L of HAuCl<sub>4</sub> is the maximum lethal concentration in both tumor and normal cells.

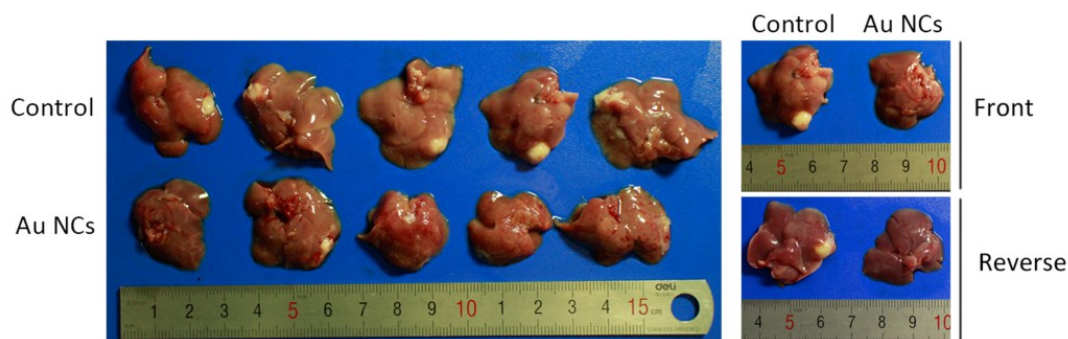

**Figure 2.** Ex vivo images of all orthotopic tumors in livers on day 38 after relevant injections. Representative images of liver are on the right, and tumors were pointed out by red arrow.

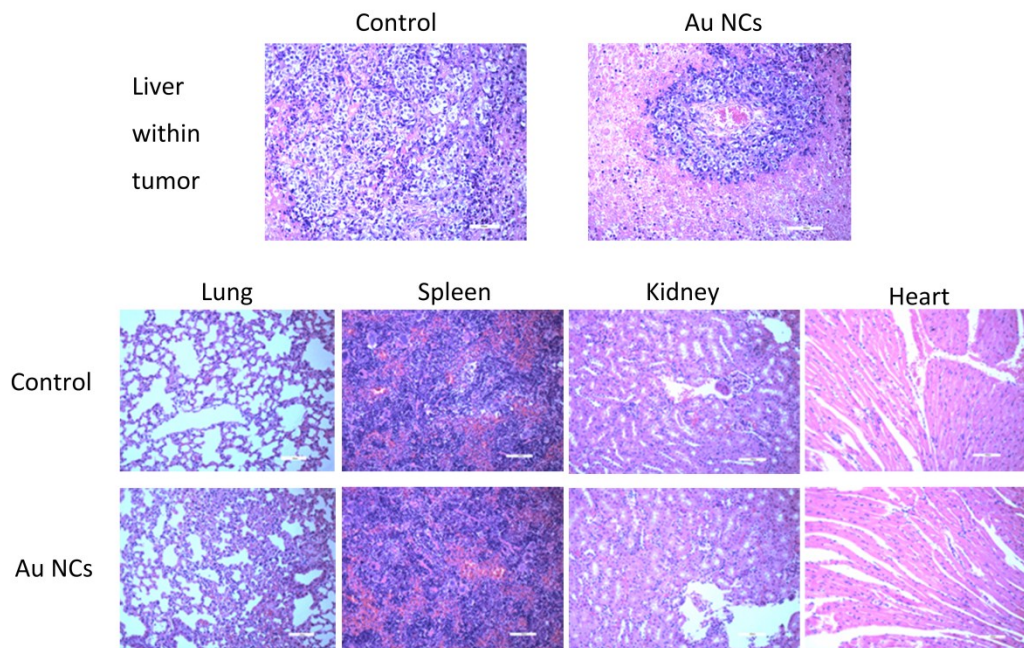

**Figure 3. Hematoxylin-eosin staining of main organs in mice.** a) The area of tumor cells in the liver of the *in situ* biosynthesized Au NCs was smaller than that of the control group. b) There was no difference in the other main organs (lung, spleen, kidney, heart) between the two groups of mice.

**Supplementary table 1.** The weight and atomic proportion of the elements corresponding to the EDS.

| Element | Weight percentage | Atomic percentage |
|---------|-------------------|-------------------|
| C K     | 65.01             | 73.85             |
| N K     | 5.49              | 5.34              |
| O K     | 17.96             | 15.32             |
| Mg K    | 0.08              | 0.04              |
| Si K    | 9.80              | 4.76              |
| P K     | 1.11              | 0.49              |
| S K     | 0.44              | 0.19              |
| Au M    | 0.10              | 0.01              |
| total   | 100.00            |                   |

**Supplementary table 2.** Routine blood examination from the mice at 6h after mice sacrificed.

| Groups  | WBC( $10^9/L$ ) | RBC( $10^{12}/L$ ) | PLT( $10^9/L$ ) |
|---------|-----------------|--------------------|-----------------|
| Control | 13.77+0.35      | 8.97+1.97          | 1017+353        |
| Au NCs  | 13.92+0.15      | 8.70+1.47          | 913+221         |

**Supplementary table 3.** Biochemical parameters of blood from the mice at 6h after mice sacrificed.

| Groups  | BUN(mM)       | UA( $\mu$ M) | ALT(U/L)    | AST(U/L)     |
|---------|---------------|--------------|-------------|--------------|
| Control | 4.6 $\pm$ 0.5 | 166 $\pm$ 12 | 99 $\pm$ 15 | 172 $\pm$ 10 |
| Au NCs  | 4.1 $\pm$ 0.5 | 187 $\pm$ 18 | 97 $\pm$ 10 | 170 $\pm$ 15 |
